# Supplementary figures and images for: A real-time measurement system for gene expression rhythms from deep tissues of freely moving mice under light-dark conditions
Source: PubMed Central journal article supplement — Biochem Biophys Rep. 2022 Sep 18;32:101344. doi: 10.1016/j.bbrep.2022.101344 (PMC9489493; doi:10.1016/j.bbrep.2022.101344), 2022-09-18

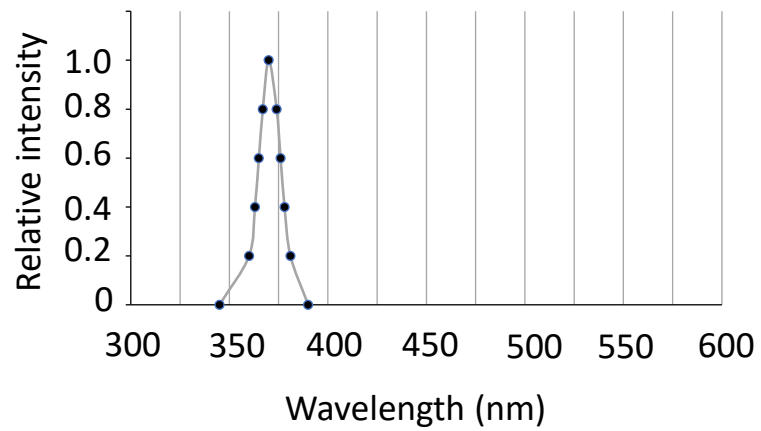

Supplementary FigureS1

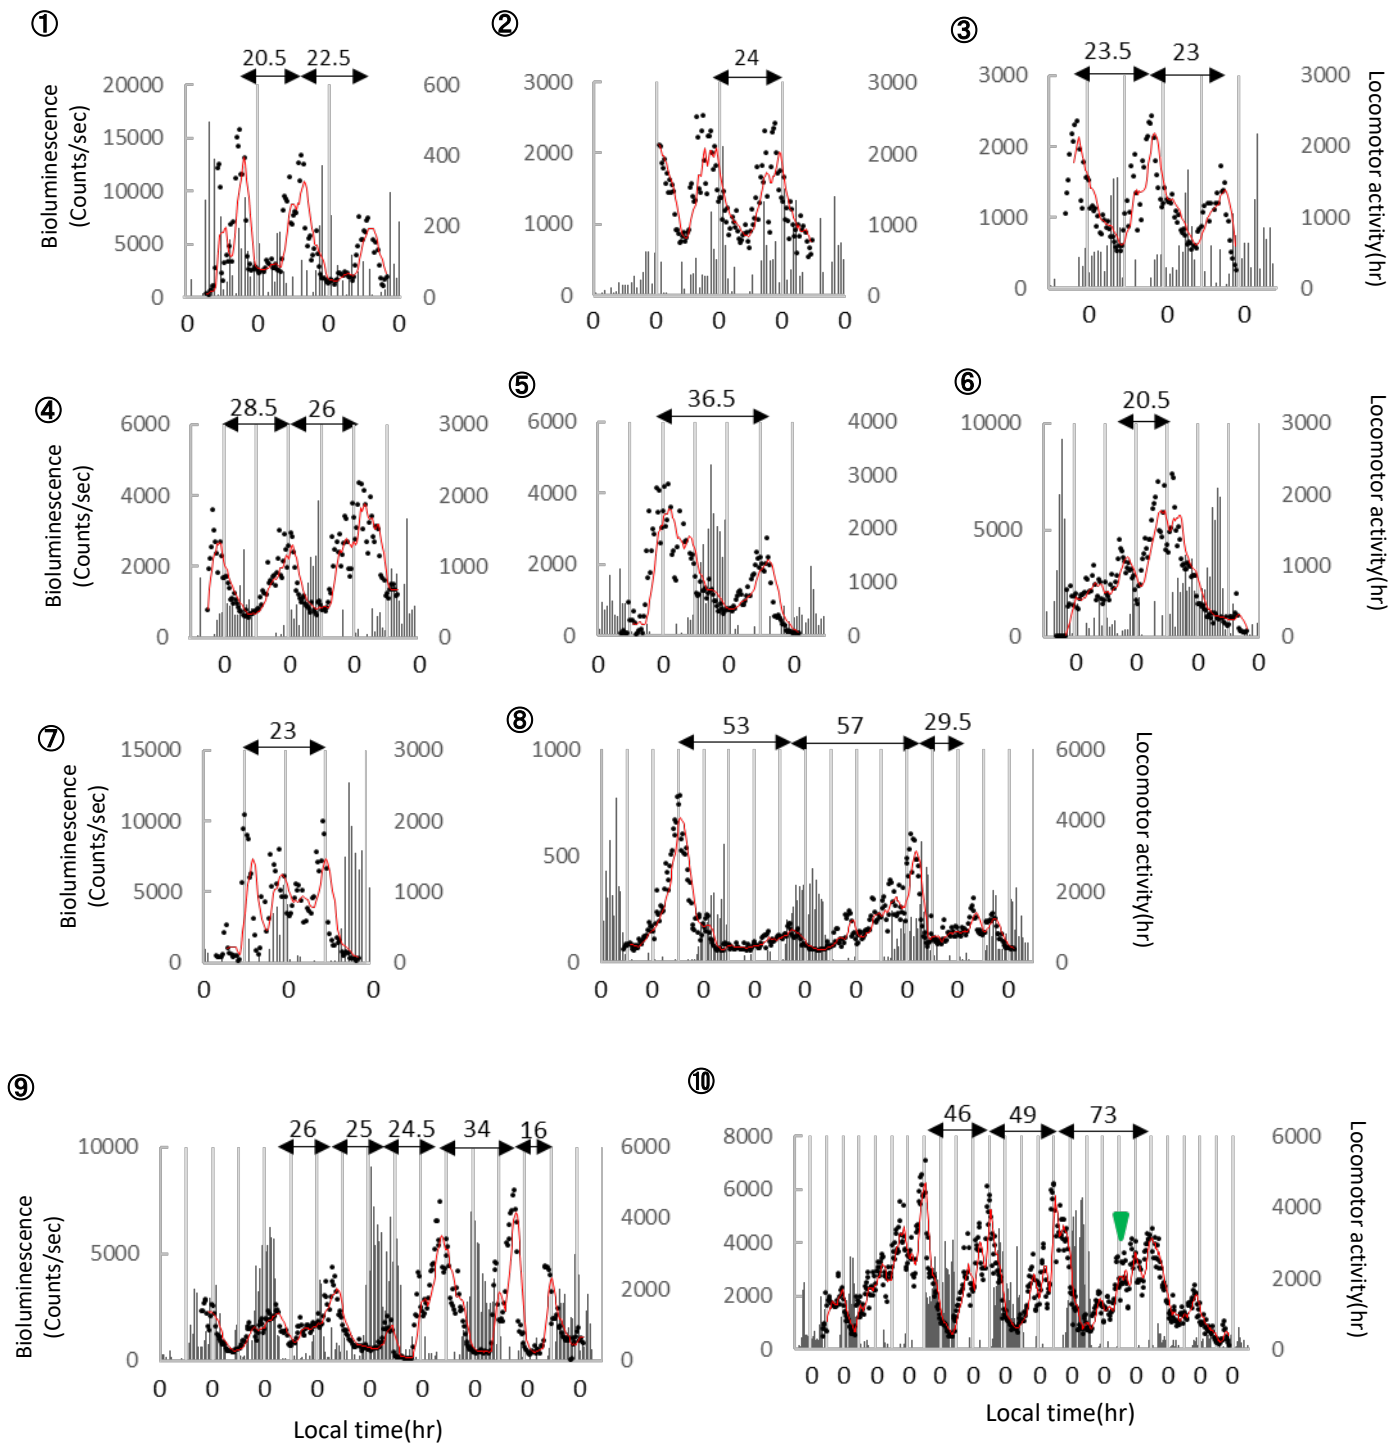

Supplementary FigureS2

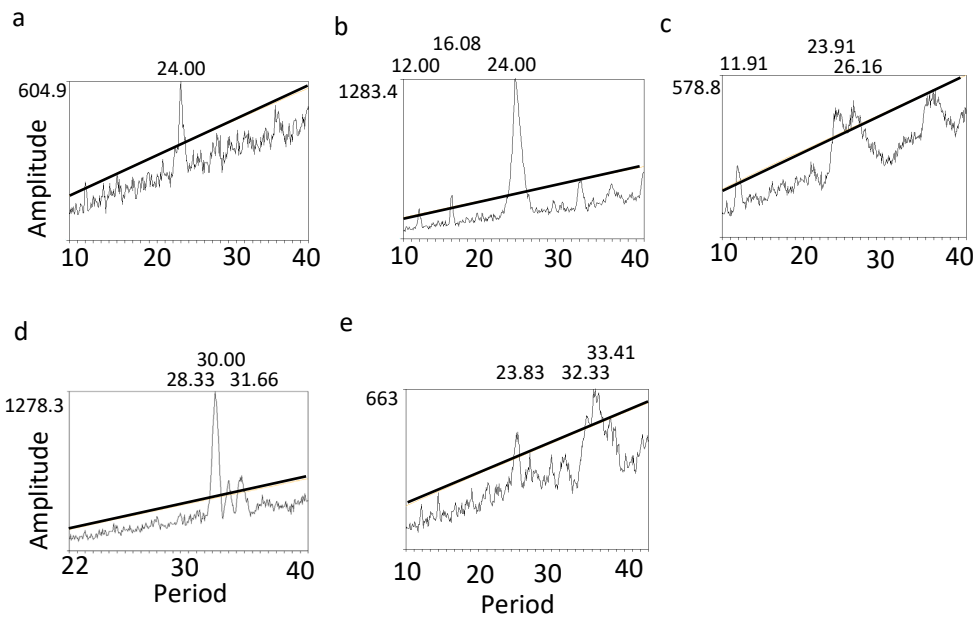

Supplementary FigureS3

Supplement: mmc2.pdf [file mmc2.pdf]
